# Supplementary material
Source: PubMed Central journal article supplement (PMC6905222)
Supplement: plantbiotechnology-35-4-18.0810a-s001.pdf [file plantbiotechnology-35-4-18.0810a-s001.pdf]

## Nakamura et al. Supplementary Information

Supplementary Table S1. The estimated content of triterpenoids in *A. marina* leaves  
The estimated content of each triterpenoid in leaves was calculated based on peak areas from the mass chromatogram shown in Figure 1, by comparing the area of the authentic standard with known concentrations.

| Compound (Peak No.)  | Content (mg/g-dry weight) |
|----------------------|---------------------------|
| $\beta$ -amyrin (1)  | 0.38                      |
| $\alpha$ -amyrin (2) | 0.56                      |
| lupeol (3)           | 2.94                      |
| erythrodiol (4)      | 0.03                      |
| uvaol (5)            | 0.13                      |
| betulin (6)          | 0.21                      |
| oleanolic acid (7)   | 0.12                      |
| betulinic acid (8)   | 0.97                      |
| ursolic acid (9)     | 4.06                      |
| maslinic acid (10)   | 0.06                      |
| corosolic acid (11)  | 0.35                      |

Supplementary Table S2. Yeast strains generated in this study

| Strain No. | Genotype                                                                                   |
|------------|--------------------------------------------------------------------------------------------|
| 1          | INVSc1; pYES3[ADH/bAS]; pESC-LEU[GAL10/CPR]                                                |
| 2          | INVSc1; pYES3[ADH/bAS]; pESC-LEU[GAL10/CPR, GAL1/CYP716A259]                               |
| 3          | INVSc1; pYES3[ADH/bAS]; pESC-LEU[GAL10/CPR, GAL1/CYP716A260]                               |
| 4          | INVSc1; pYES3[ADH/bAS]; pESC-LEU[GAL10/CPR, GAL1/CYP716C53]                                |
| 5          | INVSc1; pYES3[ADH/bAS]; pESC-LEU[GAL10/CPR, GAL1/CYP716C54]                                |
| 6          | INVSc1; pYES3[ADH/bAS]; pESC-LEU[GAL10/CPR, GAL1/CYP716D59]                                |
| 7          | INVSc1; pYES3[ADH/aAS]; pESC-LEU[GAL10/CPR]                                                |
| 8          | INVSc1; pYES3[ADH/aAS]; pESC-LEU[GAL10/CPR, GAL1/CYP716A259]                               |
| 9          | INVSc1; pYES3[ADH/aAS]; pESC-LEU[GAL10/CPR, GAL1/CYP716A260]                               |
| 10         | INVSc1; pYES3[ADH/aAS]; pESC-LEU[GAL10/CPR, GAL1/CYP716C53]                                |
| 11         | INVSc1; pYES3[ADH/aAS]; pESC-LEU[GAL10/CPR, GAL1/CYP716C54]                                |
| 12         | INVSc1; pYES3[ADH/aAS]; pESC-LEU[GAL10/CPR, GAL1/CYP716D59]                                |
| 13         | INVSc1; pYES3[ADH/LUS]; pESC-LEU[GAL10/CPR]                                                |
| 14         | INVSc1; pYES3[ADH/LUS]; pESC-LEU[GAL10/CPR, GAL1/CYP716A259]                               |
| 15         | INVSc1; pYES3[ADH/LUS]; pESC-LEU[GAL10/CPR, GAL1/CYP716A260]                               |
| 16         | INVSc1; pYES3[ADH/LUS]; pESC-LEU[GAL10/CPR, GAL1/CYP716C53]                                |
| 17         | INVSc1; pYES3[ADH/LUS]; pESC-LEU[GAL10/CPR, GAL1/CYP716C54]                                |
| 18         | INVSc1; pYES3[ADH/LUS]; pESC-LEU[GAL10/CPR, GAL1/CYP716D59]                                |
| 19         | INVSc1; pYES3[ADH/bAS]; pESC-LEU[GAL10/CPR, GAL1/CYP716A259]; pYES-DEST52[GALI/-]          |
| 20         | INVSc1; pYES3[ADH/bAS]; pESC-LEU[GAL10/CPR, GAL1/CYP716A259]; pYES-DEST52[GALI/CYP716A260] |
| 21         | INVSc1; pYES3[ADH/bAS]; pESC-LEU[GAL10/CPR, GAL1/CYP716A259]; pYES-DEST52[GALI/CYP716C53]  |
| 22         | INVSc1; pYES3[ADH/bAS]; pESC-LEU[GAL10/CPR, GAL1/CYP716A259]; pYES-DEST52[GALI/CYP716C54]  |
| 23         | INVSc1; pYES3[ADH/bAS]; pESC-LEU[GAL10/CPR, GAL1/CYP716A259]; pYES-DEST52[GALI/CYP716D59]  |
| 24         | INVSc1; pYES3[ADH/aAS]; pESC-LEU[GAL10/CPR, GAL1/CYP716A259]; pYES-DEST52[GALI/-]          |
| 25         | INVSc1; pYES3[ADH/aAS]; pESC-LEU[GAL10/CPR, GAL1/CYP716A259]; pYES-DEST52[GALI/CYP716C53]  |
| 26         | INVSc1; pYES3[ADH/LUS]; pESC-LEU[GAL10/CPR, GAL1/CYP716A259]; pYES-DEST52[GALI/-]          |
| 27         | INVSc1; pYES3[ADH/LUS]; pESC-LEU[GAL10/CPR, GAL1/CYP716A259]; pYES-DEST52[GALI/CYP716C53]  |

Supplementary Table S3. Primers used in this study

| <b>Primer No.</b> | <b>Sequence (5' to 3')</b>              |
|-------------------|-----------------------------------------|
| 1                 | <u>CACCATGGAGGTCTTCTATGCTACTTTCC</u>    |
| 2                 | TTATGCTGCAGATTGGTGAGGATAGAGGC           |
| 3                 | <u>CACCATGGAGGTCTTCTTCGTAAC TTAC</u>    |
| 4                 | TTAAGCTTTGTGTGGGAGTAGGCGAAC             |
| 5                 | AAGCATTTTACGAGGCGAGCTATCC               |
| 6                 | GAACCTCGTTAGGGCTTCTGGCTTCAAG            |
| 7                 | GGTACTGAGATTATCCCCTTCAAGA               |
| 8                 | GCGTTGATGTGTTGCTGGGAAACTAG              |
| 9                 | GAAATACTCGCCGGACATCTTCAAGACC            |
| 10                | CCCTCATCAGATTCCTGGCGAAGATGGA            |
| 11                | <u>CACCATGGCTACAGATTCCTGTTGGCTG</u>     |
| 12                | TCAGTGCTGAGGGTGAAGCCGAATG               |
| 13                | <u>CACCATGGAGTTTTTTCGCTGTTGCGTTTTTC</u> |
| 14                | TCAATGATGATACAGGCGGATTGGC               |
| 15                | <u>CACCATGGAGTTTCTGGGCGTTGCCATCT</u>    |
| 16                | TTAGTACTGATAAAAGAGGATGGGC               |

The underlined sequences were added to facilitate unidirectional cloning of the product into pENTR/D-TOPO (Thermo Fisher Scientific).

Supplementary Table S4. A list of plant P450s used to construct a phylogenetic tree shown in Figure 5

| <b>CYP name</b> | <b>Species</b>                    | <b>Accession No.</b> |
|-----------------|-----------------------------------|----------------------|
| CYP51H10        | <i>Avena strigosa</i>             | DQ680852             |
| CYP716A1        | <i>Arabidopsis thaliana</i>       | NM_123002            |
| CYP716A110      | <i>Aquilegia coerulea</i>         | KU878864             |
| CYP716A111      | <i>Aquilegia coerulea</i>         | KY047600             |
| CYP716A113v1    | <i>Aquilegia coerulea</i>         | KU878866             |
| CYP716A12       | <i>Medicago truncatula</i>        | DQ335781             |
| CYP716A140      | <i>Platycodon grandiflorus</i>    | KU878853             |
| CYP716A141      | <i>Platycodon grandiflorus</i>    | KU878855             |
| CYP716A14v2     | <i>Artemisia annua</i>            | KF309251             |
| CYP716A15       | <i>Vitis vinifera</i>             | AB619802             |
| CYP716A154      | <i>Catharanthus roseus</i>        | JN565975             |
| CYP716A17       | <i>Vitis vinifera</i>             | AB619803             |
| CYP716A175      | <i>Malus x domestica</i>          | XM_008392874         |
| CYP716A179      | <i>Glycyrrhiza uralensis</i>      | LC157867             |
| CYP716A2        | <i>Arabidopsis thaliana</i>       | LC106013             |
| CYP716A244      | <i>Eleutherococcus senticosus</i> | KX354739             |
| CYP716A252      | <i>Ocimum basilicum</i>           | JQ958967             |
| CYP716A253      | <i>Ocimum basilicum</i>           | JQ958968             |
| CYP716A52v2     | <i>Panax ginseng</i>              | JX036032             |
| CYP716A75       | <i>Maesa lanceolata</i>           | KF318733             |
| CYP716A78       | <i>Chenopodium quinoa</i>         | KX343075             |
| CYP716A79       | <i>Chenopodium quinoa</i>         | KX343076             |
| CYP716A80       | <i>Barbarea vulgaris</i>          | KP795926             |
| CYP716A81       | <i>Barbarea vulgaris</i>          | KP795925             |
| CYP716A83       | <i>Centella asiatica</i>          | KU878849             |
| CYP716A86       | <i>Centella asiatica</i>          | KU878848             |
| CYP716C11       | <i>Centella asiatica</i>          | KU878852             |
| CYP716E41       | <i>Centella asiatica</i>          | KU878851             |
| CYP716S1        | <i>Panax ginseng</i>              | JX036031             |
| CYP716S5        | <i>Platycodon grandiflorus</i>    | KU878856             |
| CYP716U1        | <i>Panax ginseng</i>              | JN604536             |

|          |                            |          |
|----------|----------------------------|----------|
| CYP716Y1 | <i>Bupleurum falcatum</i>  | KC963423 |
| CYP72A67 | <i>Medicago truncatula</i> | DQ335780 |

Supplementary Table S5. Contigs related to metabolic pathways

| Contig                                   | KO assignment | EC number     | Definition                                            |
|------------------------------------------|---------------|---------------|-------------------------------------------------------|
| <b>Flavonoid biosynthesis</b>            |               |               |                                                       |
| Contig00016645                           | K00475        | EC:1.14.11.9  | Naringenin 3-dioxygenase                              |
| Contig00001041                           | K00487        | EC:1.14.13.11 | Trans-cinnamate 4-monooxygenase                       |
| Contig00006136                           | K00487        | EC:1.14.13.11 | Trans-cinnamate 4-monooxygenase                       |
| Contig00002512                           | K00588        | EC:2.1.1.104  | Caffeoyl-CoA O-methyltransferase                      |
| Contig00017344                           | K00588        | EC:2.1.1.104  | Caffeoyl-CoA O-methyltransferase                      |
| Contig00032590                           | K00588        | EC:2.1.1.104  | Caffeoyl-CoA O-methyltransferase                      |
| Contig00000069                           | K00660        | EC:2.3.1.74   | Chalcone synthase                                     |
| Contig00000070                           | K00660        | EC:2.3.1.74   | Chalcone synthase                                     |
| Contig00002910                           | K01859        | EC:5.5.1.6    | Chalcone isomerase                                    |
| Contig00003032                           | K01859        | EC:5.5.1.6    | Chalcone isomerase                                    |
| Contig00031432                           | K05277        | EC:1.14.11.19 | Leucoanthocyanidin dioxygenase                        |
| Contig00003503                           | K05278        | EC:1.14.11.23 | Flavonol synthase                                     |
| Contig00000141                           | K05280        | EC:1.14.13.21 | Flavonoid 3'-monooxygenase                            |
| Contig00000142                           | K05280        | EC:1.14.13.21 | Flavonoid 3'-monooxygenase                            |
| Contig00001063                           | K09754        | EC:1.14.13.36 | Coumaroylquinate(coumaroylshikimate) 3'-monooxygenase |
| Contig00009712                           | K13065        | EC:2.3.1.133  | Shikimate O-hydroxycinnamoyltransferase               |
| <b>Flavone and flavonol biosynthesis</b> |               |               |                                                       |
| Contig00000141                           | K05280        | EC:1.14.13.21 | Flavonoid 3'-monooxygenase                            |
| Contig00000142                           | K05280        | EC:1.14.13.21 | Flavonoid 3'-monooxygenase                            |
| Contig00003088                           | K10757        | EC:2.4.1.91   | Flavonol 3-O-glucosyltransferase                      |
| <b>Anthocyanin biosynthesis</b>          |               |               |                                                       |
| Contig00009065                           | K17193        | EC:2.4.2.51   | Anthocyanidin 3-O-glucoside 2"-O-xylosyltransferase   |
| <b>Terpenoid backbone biosynthesis</b>   |               |               |                                                       |
| Contig00002991                           | K00021        | EC:1.1.1.34   | Hydroxymethylglutaryl-CoA reductase (NADPH)           |

|                |        |              |                                                                              |
|----------------|--------|--------------|------------------------------------------------------------------------------|
| Contig00027198 | K00021 | EC:1.1.1.34  | Hydroxymethylglutaryl-CoA reductase (NADPH)                                  |
| Contig00004953 | K00099 | EC:1.1.1.267 | 1-deoxy-D-xylulose-5-phosphate reductoisomerase                              |
| Contig00010665 | K00587 | EC:2.1.1.100 | Protein-S-isoprenylcysteine O-methyltransferase                              |
| Contig00001560 | K00626 | EC:2.3.1.9   | Acetyl-CoA C-acetyltransferase                                               |
| Contig00000300 | K00787 | EC:2.5.1.1   | Farnesyl diphosphate synthase                                                |
| Contig00013905 | K00869 | EC:2.7.1.36  | MvaK1; mevalonate kinase                                                     |
| Contig00007619 | K00919 | EC:2.7.1.148 | 4-diphosphocytidyl-2-C-methyl-D-erythritol kinase                            |
| Contig00012361 | K00919 | EC:2.7.1.148 | 4-diphosphocytidyl-2-C-methyl-D-erythritol kinase                            |
| Contig00016808 | K00938 | EC:2.7.4.2   | Phosphomevalonate kinase                                                     |
| Contig00014536 | K00991 | EC:2.7.7.60  | 2-C-methyl-D-erythritol 4-phosphate cytidyltransferase                       |
| Contig00016181 | K01597 | EC:4.1.1.33  | Diphosphomevalonate decarboxylase                                            |
| Contig00000487 | K01641 | EC:2.3.3.10  | Hydroxymethylglutaryl-CoA synthase                                           |
| Contig00000533 | K01641 | EC:2.3.3.10  | Hydroxymethylglutaryl-CoA synthase                                           |
| Contig00007119 | K01641 | EC:2.3.3.10  | Hydroxymethylglutaryl-CoA synthase                                           |
| Contig00007289 | K01662 | EC:2.2.1.7   | 1-deoxy-D-xylulose-5-phosphate synthase                                      |
| Contig00001549 | K01770 | EC:4.6.1.12  | 2-C-methyl-D-erythritol 2,4-cyclodiphosphate synthase                        |
| Contig00011922 | K01770 | EC:4.6.1.12  | 2-C-methyl-D-erythritol 2,4-cyclodiphosphate synthase                        |
| Contig00008632 | K01823 | EC:5.3.3.2   | Isopentenyl-diphosphate Delta-isomerase                                      |
| Contig00021964 | K01823 | EC:5.3.3.2   | Isopentenyl-diphosphate Delta-isomerase                                      |
| Contig00004156 | K03526 | EC:1.17.7.1  | (E)-4-hydroxy-3-methylbut-2-enyl-diphosphate synthase                        |
| Contig00007194 | K03526 | EC:1.17.7.1  | (E)-4-hydroxy-3-methylbut-2-enyl-diphosphate synthase                        |
| Contig00001843 | K03527 | EC:1.17.7.4  | 4-hydroxy-3-methylbut-2-en-1-yl diphosphate reductase                        |
| Contig00000067 | K05356 | EC:2.5.1.84  | All-trans-nonaprenyl-diphosphate synthase                                    |
| Contig00013354 | K05906 | EC:1.8.3.5   | Prenylcysteine oxidase / farnesylcysteine lyase                              |
| Contig00004669 | K05954 | EC:2.5.1.58  | Protein farnesyltransferase subunit beta                                     |
| Contig00010059 | K05955 | EC:2.5.1.58  | Protein farnesyltransferase/geranylgeranyltransferase type-1 subunit alpha   |
| Contig00025026 | K06013 | EC:3.4.24.84 | STE24 endopeptidase                                                          |
| Contig00018397 | K08658 | EC:3.4.22.-  | Prenyl protein peptidase                                                     |
| Contig00001034 | K10960 | EC:1.3.1.83  | Geranylgeranyl diphosphate/geranylgeranyl-bacteriochlorophyllide a reductase |

|                                                      |        |               |                                                 |
|------------------------------------------------------|--------|---------------|-------------------------------------------------|
| Contig00002983                                       | K11778 | EC:2.5.1.87   | Ditrans,polycis-polyprenyl diphosphate synthase |
| Contig00012970                                       | K11778 | EC:2.5.1.87   | Ditrans,polycis-polyprenyl diphosphate synthase |
| Contig00015907                                       | K11778 | EC:2.5.1.87   | Ditrans,polycis-polyprenyl diphosphate synthase |
| Contig00001824                                       | K13789 | EC:2.5.1.1    | Geranylgeranyl diphosphate synthase, type II    |
| Contig00014790                                       | K13789 | EC:2.5.1.1    | Geranylgeranyl diphosphate synthase, type II    |
| Contig00020329                                       | K13789 | EC:2.5.1.1    | Geranylgeranyl diphosphate synthase, type II    |
| Contig00003105                                       | K14066 | EC:2.5.1.1    | Geranyl diphosphate synthase                    |
| Contig00019678                                       | K15889 | EC:3.1.1.-    | Prenylcysteine alpha-carboxyl methylesterase    |
| Contig00014662                                       | K15891 | EC:1.1.1.354  | NAD+-dependent farnesol dehydrogenase           |
| Contig00010533                                       | K15892 | EC:2.7.1.216  | Farnesol kinase                                 |
| <b>Monoterpenoid biosynthesis</b>                    |        |               |                                                 |
| Contig00012347                                       | K15095 | EC:1.1.1.208  | (+)-neomenthol dehydrogenase                    |
| <b>Sesquiterpenoid and triterpenoid biosynthesis</b> |        |               |                                                 |
| Contig00002510                                       | K00511 | EC:1.14.14.17 | Squalene monooxygenase                          |
| Contig00019347                                       | K00511 | EC:1.14.14.17 | Squalene monooxygenase                          |
| Contig00000979                                       | K00801 | EC:2.5.1.21   | Farnesyl-diphosphate farnesyltransferase        |
| Contig00000012                                       | K14184 | EC:4.2.3.104  | Alpha-humulene/beta-caryophyllene synthase      |
| Contig00004015                                       | K15815 | EC:5.4.99.39  | Lupeol synthase 2                               |
| Contig00014662                                       | K15891 | EC:1.1.1.354  | NAD+-dependent farnesol dehydrogenase           |
| <b>Diterpenoid biosynthesis</b>                      |        |               |                                                 |
| Contig00029901                                       | K04121 | EC:4.2.3.19   | Ent-kaurene synthase                            |
| Contig00027530                                       | K04122 | EC:1.14.13.78 | Ent-kaurene oxidase                             |
| Contig00035467                                       | K04123 | EC:1.14.13.79 | Ent-kaurenoic acid hydroxylase                  |
| Contig00022284                                       | K04124 | EC:1.14.11.15 | Gibberellin 3-beta-dioxygenase                  |
| Contig00027341                                       | K04125 | EC:1.14.11.13 | Gibberellin 2-oxidase                           |
| Contig00028311                                       | K04125 | EC:1.14.11.13 | Gibberellin 2-oxidase                           |
| Contig00011784                                       | K05282 | EC:1.14.11.12 | Gibberellin 20-oxidase                          |
| Contig00013148                                       | K05282 | EC:1.14.11.12 | Gibberellin 20-oxidase                          |

KO, KEGG orthology

Supplementary Table S6. Contigs related to the mevalonate pathway and triterpenoid biosynthesis

| <b>Contig</b>  | <b>KO assignment</b> | <b>EC number</b> | <b>Definition</b>                            | <b>RPKM (leaf)</b> |
|----------------|----------------------|------------------|----------------------------------------------|--------------------|
| Contig00002991 | K00021               | EC:1.1.1.34      | Hydroxymethylglutaryl-CoA reductase (NADPH)  | 29.38              |
| Contig00027198 | K00021               | EC:1.1.1.34      | Hydroxymethylglutaryl-CoA reductase (NADPH)  | 6.17               |
| Contig00002510 | K00511               | EC:1.14.14.17    | Squalene monooxygenase                       | 40.74              |
| Contig00019347 | K00511               | EC:1.14.14.17    | Squalene monooxygenase                       | 4.74               |
| Contig00001560 | K00626               | EC:2.3.1.9       | Acetyl-CoA C-acetyltransferase               | 71.92              |
| Contig00000300 | K00787               | EC:2.5.1.10      | Farnesyl diphosphate synthase                | 15.98              |
| Contig00000979 | K00801               | EC:2.5.1.21      | Farnesyl-diphosphate farnesyltransferase     | 49.73              |
| Contig00013905 | K00869               | EC:2.7.1.36      | Mevalonate kinase                            | 12.24              |
| Contig00016808 | K00938               | EC:2.7.4.2       | Phosphomevalonate kinase                     | 14.97              |
| Contig00016181 | K01597               | EC:4.1.1.33      | Diphosphomevalonate decarboxylase            | 31.29              |
| Contig00000487 | K01641               | EC:2.3.3.10      | Hydroxymethylglutaryl-CoA synthase           | 10.75              |
| Contig00000533 | K01641               | EC:2.3.3.10      | Hydroxymethylglutaryl-CoA synthase           | 18.95              |
| Contig00007119 | K01641               | EC:2.3.3.10      | Hydroxymethylglutaryl-CoA synthase           | 9.72               |
| Contig00001824 | K13789               | EC:2.5.1.10      | Geranylgeranyl diphosphate synthase, type II | 129.10             |
| Contig00014790 | K13789               | EC:2.5.1.10      | Geranylgeranyl diphosphate synthase, type II | 16.97              |
| Contig00020329 | K13789               | EC:2.5.1.10      | Geranylgeranyl diphosphate synthase, type II | 33.17              |
| Contig00004015 | K15815               | EC:5.4.99.39     | Lupeol synthase 2                            | 14.77              |
| Contig00004015 | K15815               | EC:5.4.99.40     | Lupeol synthase 2                            | 14.77              |
| Contig00004015 | K15815               | EC:5.4.99.41     | Lupeol synthase 2                            | 14.77              |

KO, KEGG orthology



Supplementary Table S7. Results of a tblastn search using CYP716A12 as a query sequence

| <b>Query</b> | <b>Subject</b>              | <b>Amino acid identities (%)</b> | <b>E value</b> | <b>Score (bits)</b> | <b>RPK M (leaf)</b> |
|--------------|-----------------------------|----------------------------------|----------------|---------------------|---------------------|
| CYP716A12    | Contig00013756 / CYP716A259 | 76                               | 0.0            | 773                 | 14.36               |
| CYP716A12    | Contig00009575 / CYP716A260 | 73                               | 0.0            | 731                 | 24.58               |
| CYP716A12    | Contig00032757 / CYP716D59  | 53                               | 1.00E-141      | 412                 | 2.32                |
| CYP716A12    | Contig00031299 / CYP716C53  | 45                               | 1.00E-116      | 349                 | 3.90                |

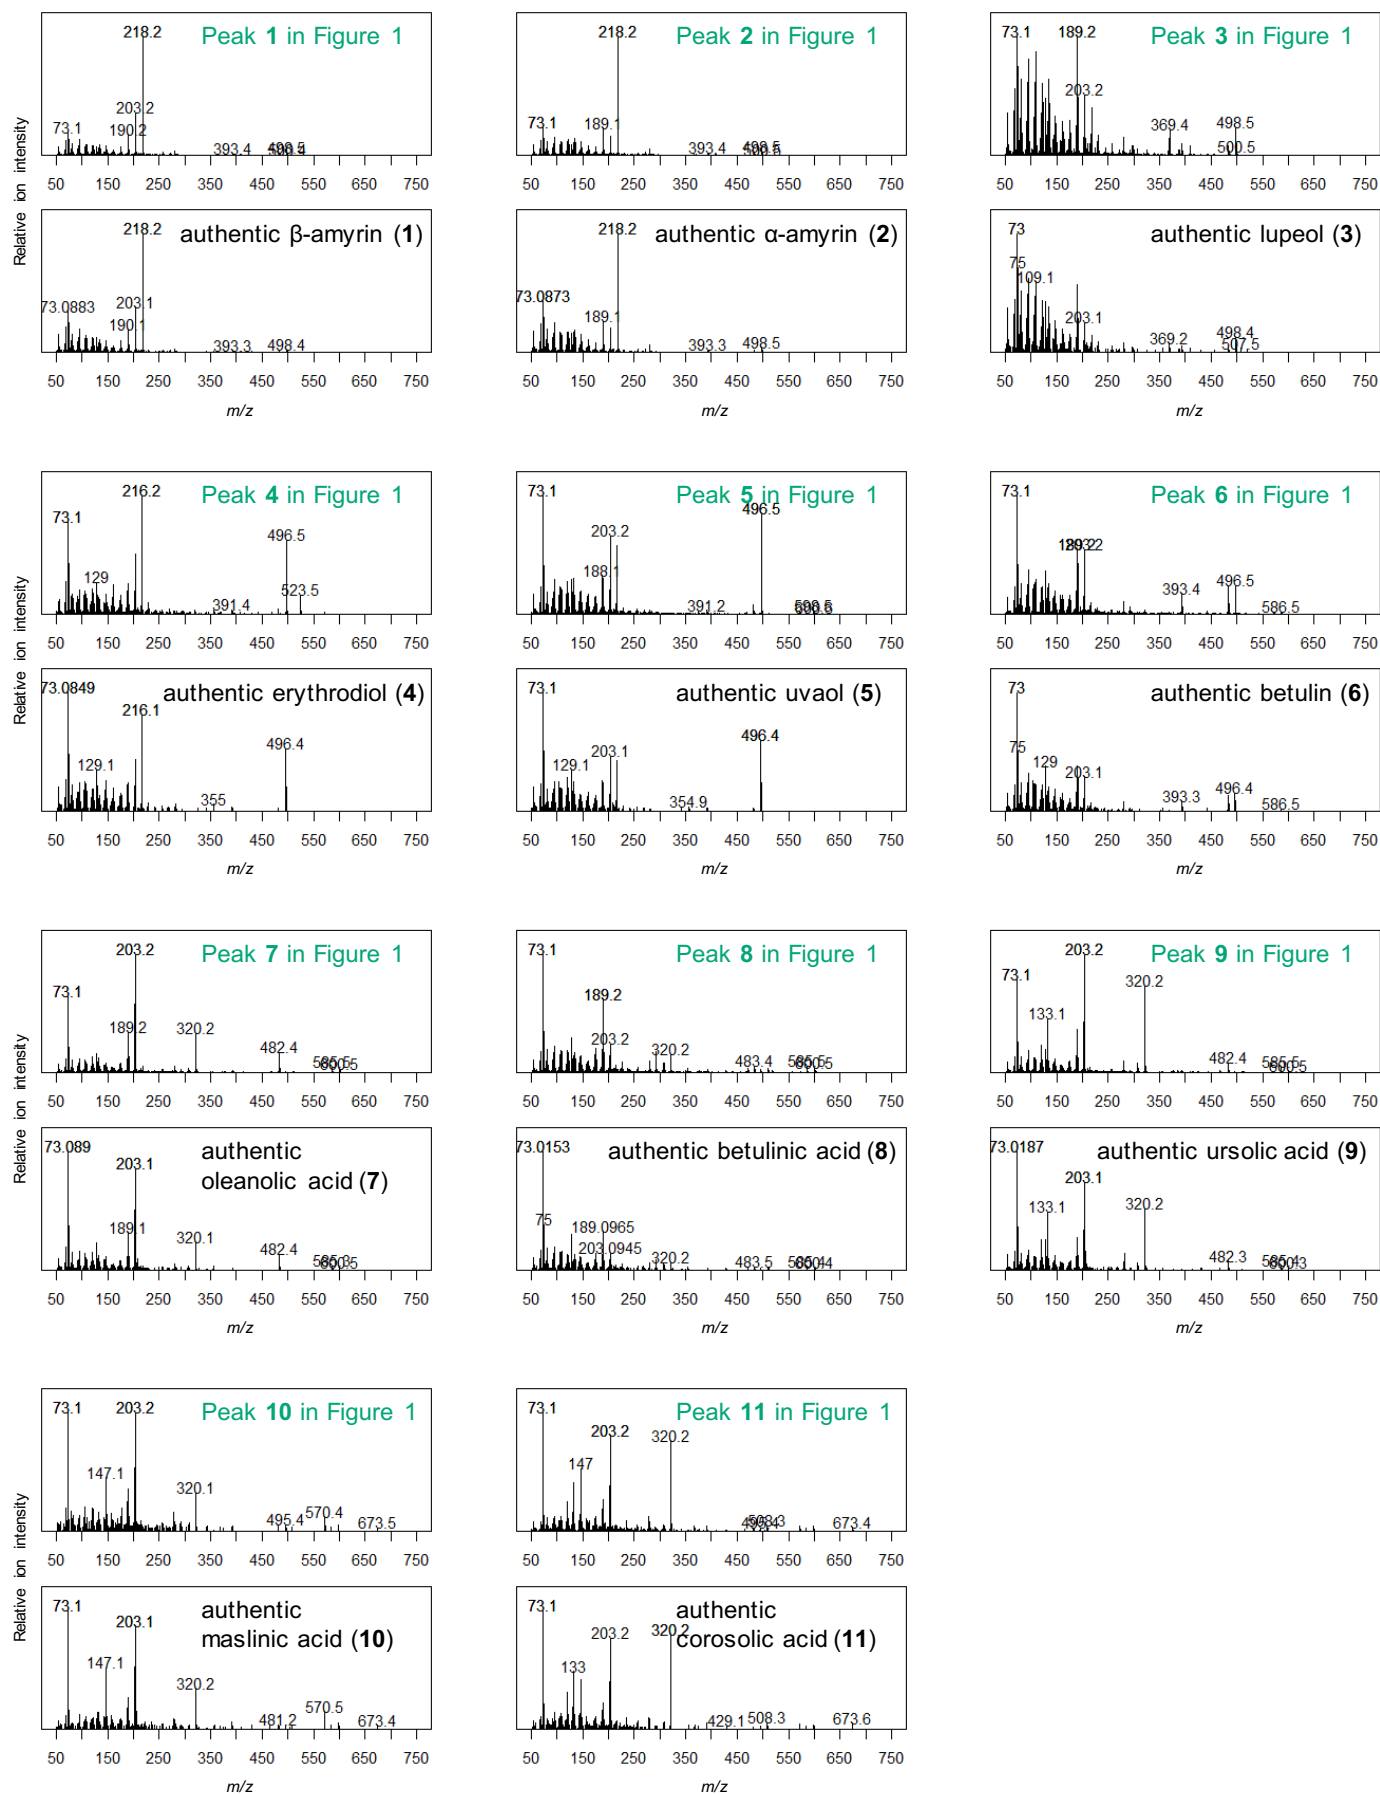

**Supplementary Figure S1. Mass spectra of the triterpenoids detected in extracts from *A. marina* leaves**

Mass spectra of peaks 1-11 from the GC profile (indicated in green) shown in Figure 1 are shown.

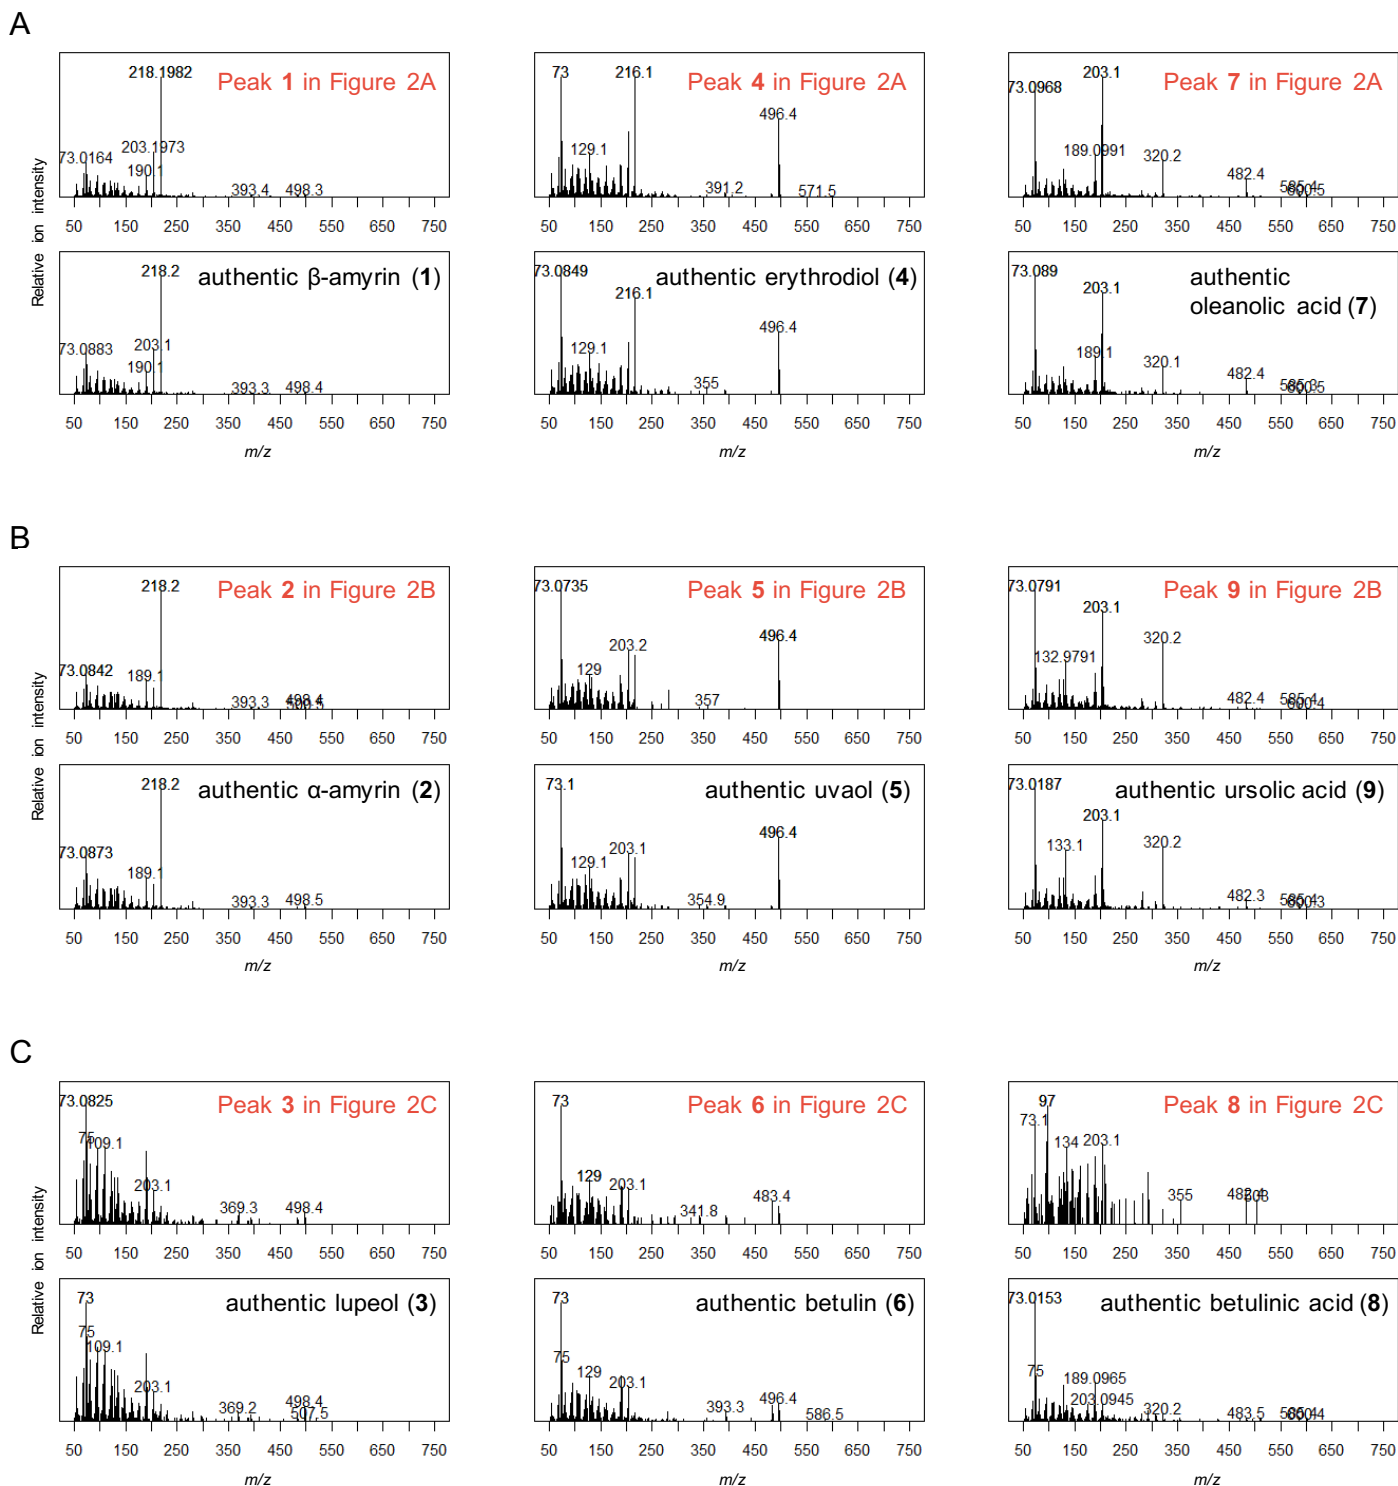

**Supplementary Figure S2. Mass spectra of the products from yeast co-expressing OSC and CYP716A259**

(A) Mass spectra of peaks 1, 4, and 7 from the GC profile shown in Figure 2A and the corresponding authentic standards are shown.

(B) Mass spectra of peaks 2, 5, and 9 from the GC profile shown in Figure 2B and the corresponding authentic standards are shown.

(C) Mass spectra of peaks 3, 6, and 8 from the GC profile shown in Figure 2C and the corresponding authentic standards are shown.

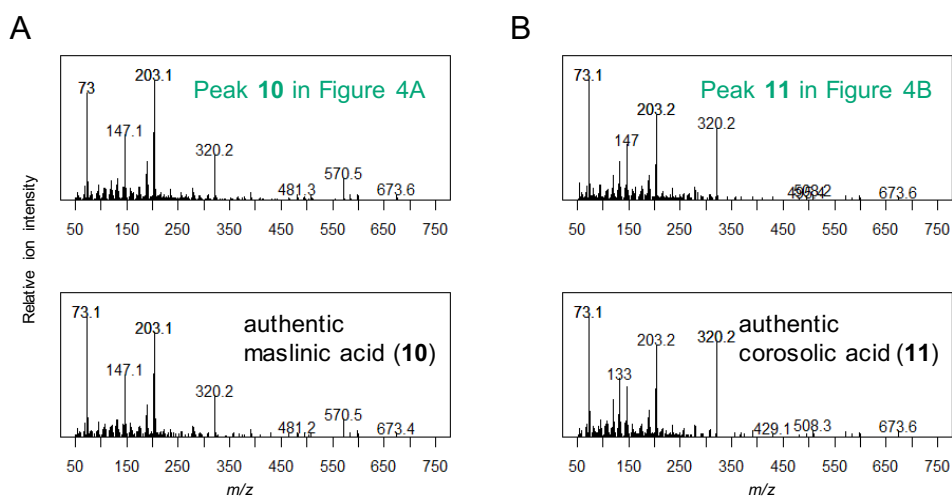

**Supplementary Figure S3. Mass spectra of the products from yeast co-expressing OSC, CPR, CYP716A259 and CYP716C53**

(A) Mass spectra of peak **10** from the GC profile shown in Figure 4A and the corresponding authentic standard are shown.

(B) Mass spectra of peak **11** from the GC profile shown in Figure 4B and the corresponding authentic standard are shown.
